# Supplementary material for: An international road map to improve pain assessment in people with impaired cognition: the development of the Pain Assessment in Impaired Cognition (PAIC) meta-tool
Source: Springer Nature journal article supplement (doi:10.1186/s12883-014-0229-5), 2014-12-01
Supplement: MOESM4 [file 9742150]

## Vocalisations

Please record each vocalisation described in the table below. Rate the intensity of each item from 'not at all' to 'a great degree'. If an item is not scored please indicate why not.

| VOCALIZATION                          | MEANING OF ITEMS                                              | Not at all | Slight degree | Moderate degree | Great degree | Not scored<br>a = Item is not clear<br>b = Situation is unsuitable<br>c = Physical status of person not suitable for scoring<br>d = Other |
|---------------------------------------|---------------------------------------------------------------|------------|---------------|-----------------|--------------|-------------------------------------------------------------------------------------------------------------------------------------------|
| Using offensive words <sup>a</sup>    | cursing, swearing, or using foul language                     | 0          | 1             | 2               | 3            | a b c d                                                                                                                                   |
| Using pain-related words <sup>a</sup> | using pain words, like "ouch", "ow", or "that hurts"          | 0          | 1             | 2               | 3            | a b c d                                                                                                                                   |
| Repeating words <sup>a</sup>          | repeating words or phrases again and again (not stuttering)   | 0          | 1             | 2               | 3            | a b c d                                                                                                                                   |
| Complaining <sup>a</sup>              | expressing being unhappy, sick, uncomfortable, and/or in pain | 0          | 1             | 2               | 3            | a b c d                                                                                                                                   |
| Shouting <sup>a</sup>                 | using a loud voice to express words                           | 0          | 1             | 2               | 3            | a b c d                                                                                                                                   |
| Mumbling <sup>a</sup>                 | uttering words and/or sounds indistinctly                     | 0          | 1             | 2               | 3            | a b c d                                                                                                                                   |
| Screaming <sup>b</sup>                | using a loud and/or high-pitched voice to express sounds      | 0          | 1             | 2               | 3            | a b c d                                                                                                                                   |
| Groaning <sup>b</sup>                 | making a deep, inarticulate sound                             | 0          | 1             | 2               | 3            | a b c d                                                                                                                                   |
| Crying <sup>b</sup>                   | whimpering, sobbing, wailing, or weeping                      | 0          | 1             | 2               | 3            | a b c d                                                                                                                                   |
| Gasping <sup>c</sup>                  | breathing sharply, laboriously, and/or loudly                 | 0          | 1             | 2               | 3            | a b c d                                                                                                                                   |
| Sighing <sup>c</sup>                  | taking in and letting out a long, loud breath                 | 0          | 1             | 2               | 3            | a b c d                                                                                                                                   |

Subcategory: <sup>a</sup>verbal utterances, <sup>b</sup>nonverbal utterances and <sup>c</sup>breaths
