# Supplementary figures and images for: An international road map to improve pain assessment in people with impaired cognition: the development of the Pain Assessment in Impaired Cognition (PAIC) meta-tool
Source: Springer Nature journal article supplement (doi:10.1186/s12883-014-0229-5), 2014-12-01

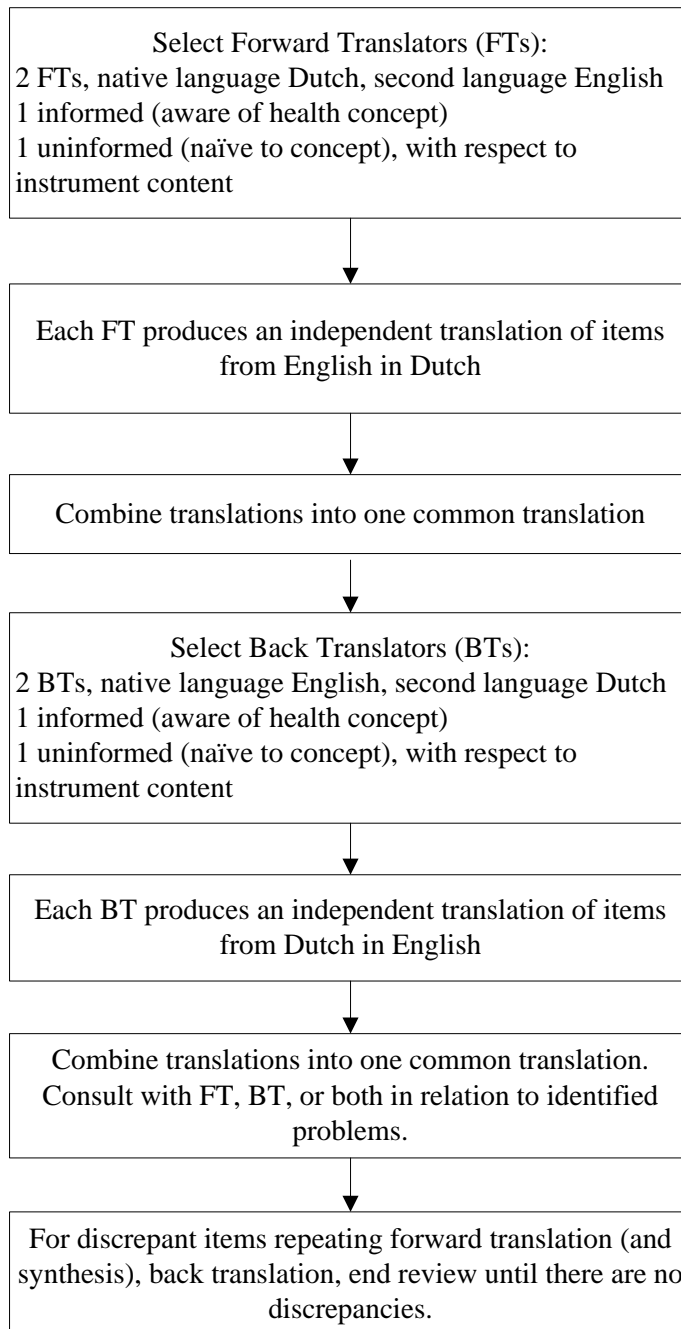

Supplement: MOESM5 [file 9742150]
